# Supplementary material for: Low-temperature processed inorganic perovskites for flexible detectors with a broadband photoresponse
Source: Royal Society of Chemistry journal article supplement (doi:10.1039/c8nr09900f), 2019-01-01
Supplement: c8nr09900f1.pdf [file c8nr09900f1.pdf]

## Supporting Information

Low-temperature Processed Inorganic Perovskites for Flexible Detectors with  
Broadband Photoresponse

Ting Zhang<sup>a</sup>, Feng Wang<sup>a</sup>, Peng Zhang<sup>a</sup>, Yafei Wang<sup>a</sup>, Hao Chen<sup>a</sup>, Jian Li<sup>a</sup>, Jiang Wu<sup>b,c</sup>,  
Li Chen<sup>a\*</sup>, Zhi David Chen<sup>a,d</sup>, Shibin Li<sup>a\*</sup>

<sup>a</sup>School of Optoelectronic Science and Engineering, University of Electronic Science  
and Technology of China, Chengdu, 610054, China

<sup>b</sup>Department of Electronic and Electrical Engineering, University College London,  
Torrington Place, London WC1E 7JE, UK

<sup>c</sup>Institute of Fundamental and Frontier Sciences, University of Electronic Science and  
Technology of China, Chengdu, 610054, China

<sup>d</sup>Department of Electrical & Computer Engineering and Center for Nanoscale Science  
& Engineering, University of Kentucky, Lexington, Kentucky 40506, USA

Corresponding Author:

Email: [shibinli@uestc.edu.cn](mailto:shibinli@uestc.edu.cn); [chen\\_li@uestc.edu.cn](mailto:chen_li@uestc.edu.cn)

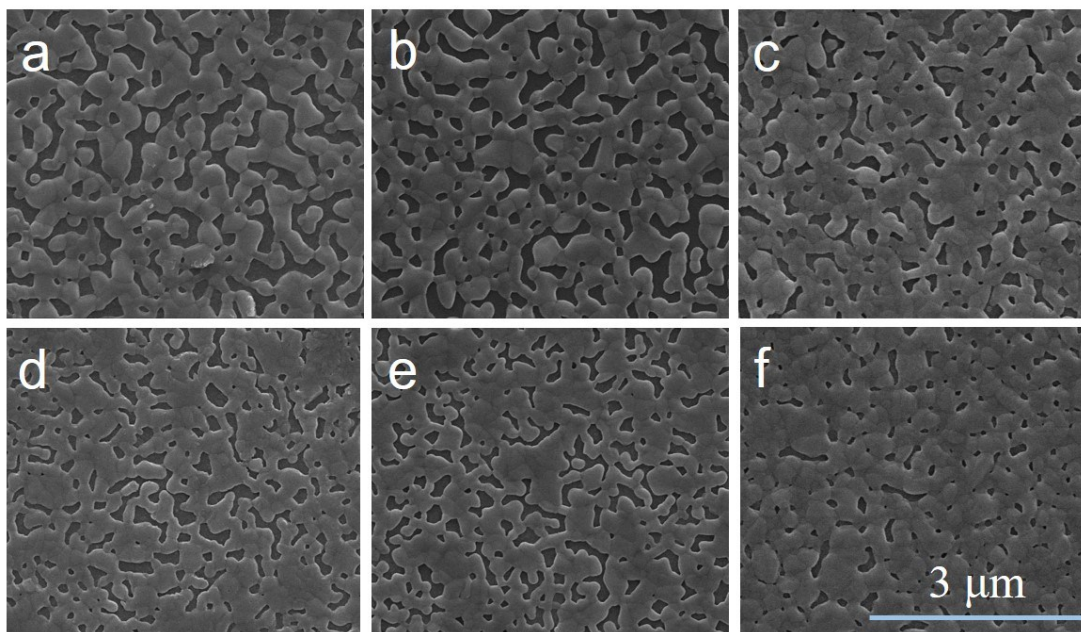

Figure S1 CsPbBr<sub>3</sub> perovskite films obtained with various duration for the first step annealing (a, 5 min; b, 8 min; c, 12 min) and immersion in IPA (d, 2 min; e, 4 min; f, 6 min).

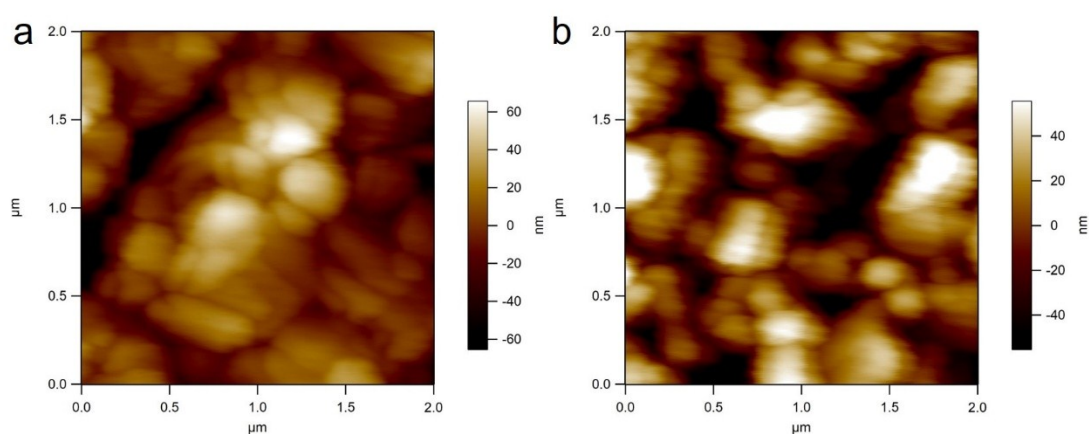

Figure S2 AFM maps of as-prepared CsPbBr<sub>3</sub> films with (a) or without (b) SE treatment.

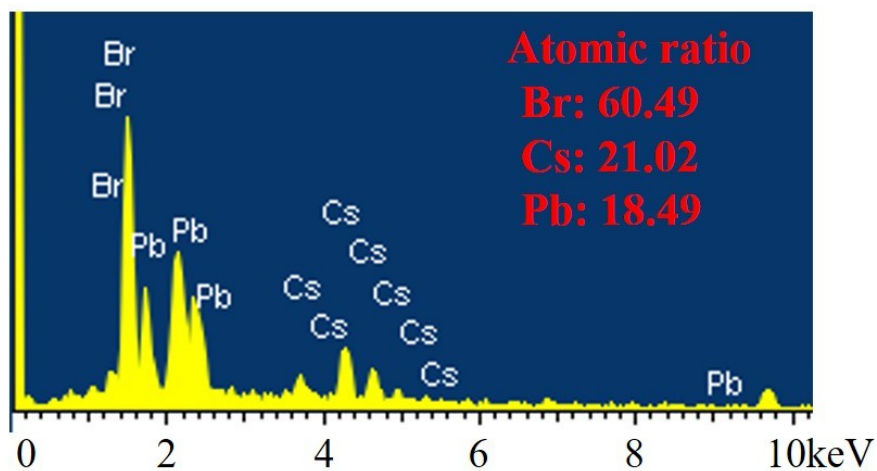

**Figure S3.** EDS spectra of a SE treated CsPbBr<sub>3</sub> film. It suggests that the stoichiometric ratio of inorganic perovskite is  $\sim 1:1:3$  for Cs:Pb:Br.

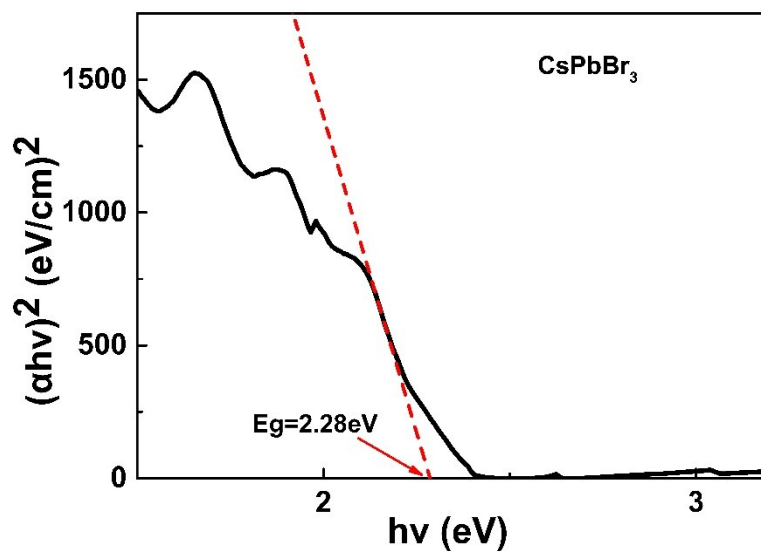

**Figure S4.** Tack plot curve of the inorganic perovskite film. The optical bandgap of CsPbBr<sub>3</sub> was measured to be  $\sim 2.28$  eV.

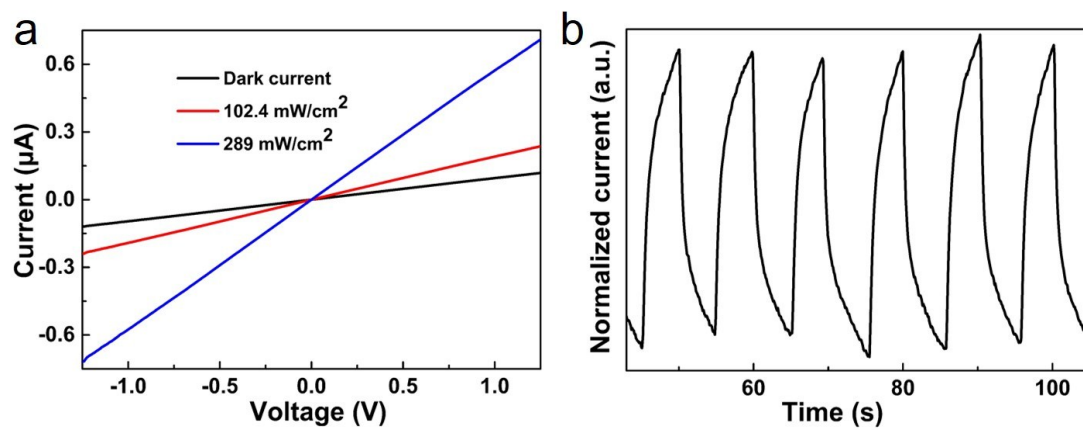

**Figure S5.** (a) I-V (b) and I-t characteristics of the flexible CsPbBr<sub>3</sub> photodetector without SE treatment.

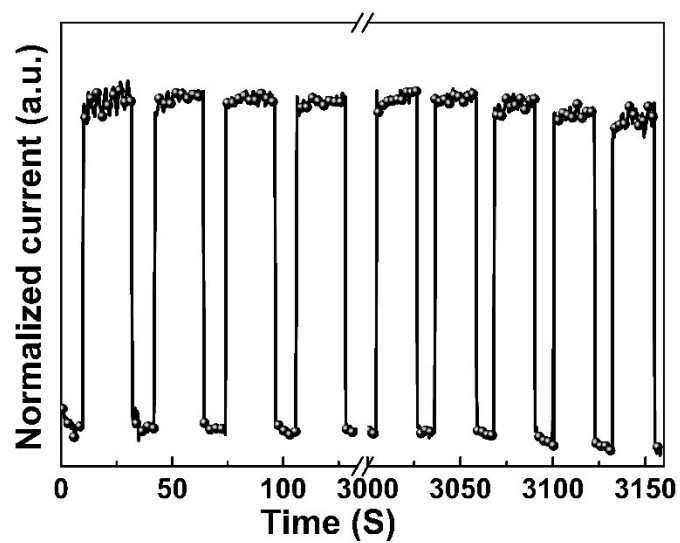

**Figure S6.** A reproducible I-t curve of the device based on treated CsPbBr<sub>3</sub> film measured under periodic light on/off.

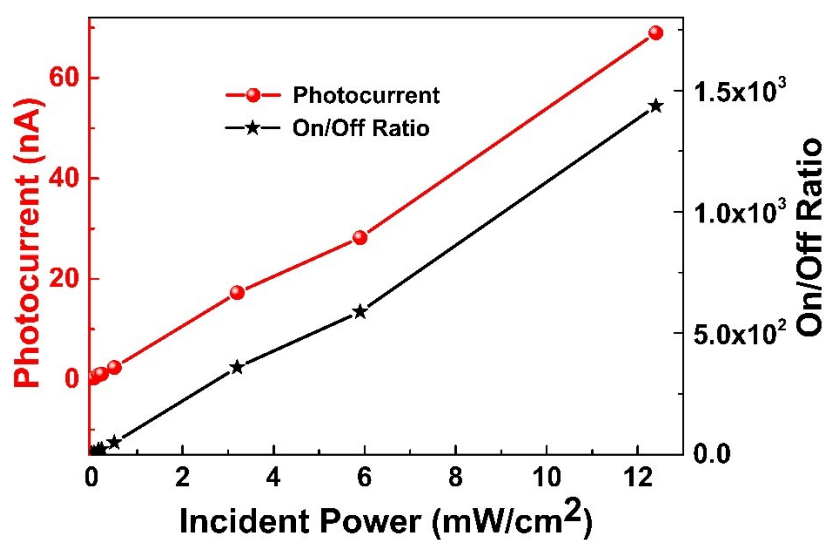

**Figure S7.** The photocurrent and on/off ratio curves of the treated CsPbBr<sub>3</sub> flexible PD.

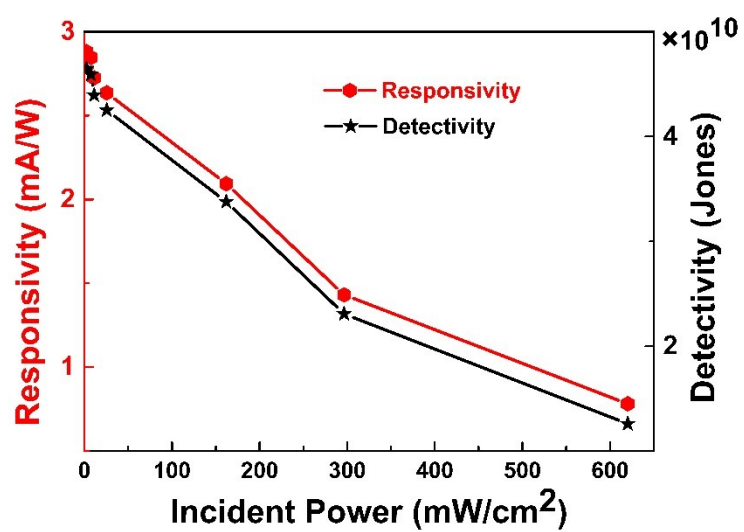

**Figure S8.** Responsivity and specific detectivity of the treated CsPbBr<sub>3</sub> flexible PD.

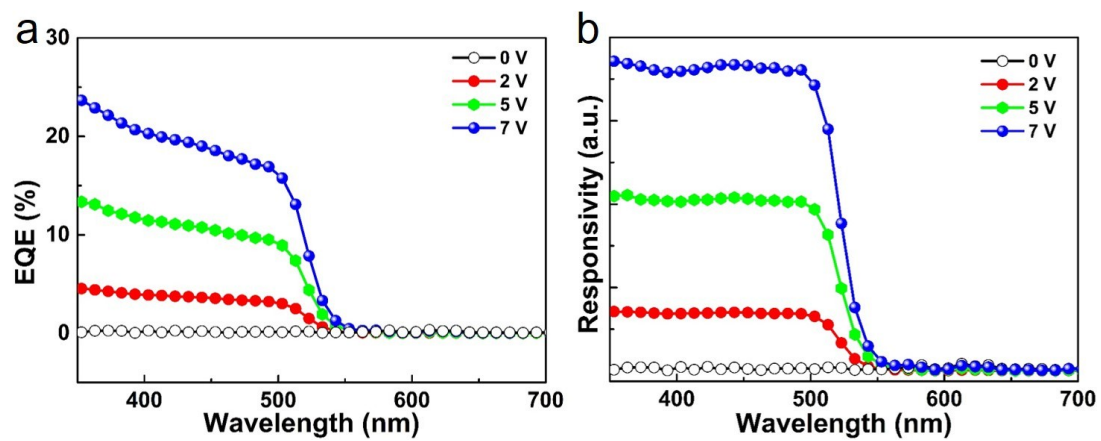

**Figure S9** (a) EQE and (b) spectral response of the treated CsPbBr<sub>3</sub> flexible PDs under different biases.

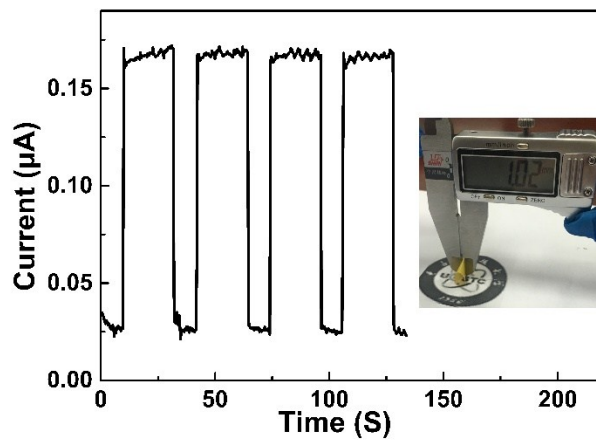

**Figure S10.** I-t curve of the device bended at 1.02 mm. Even at a deflected condition, the photocurrent response also can be measured with overload bending state.

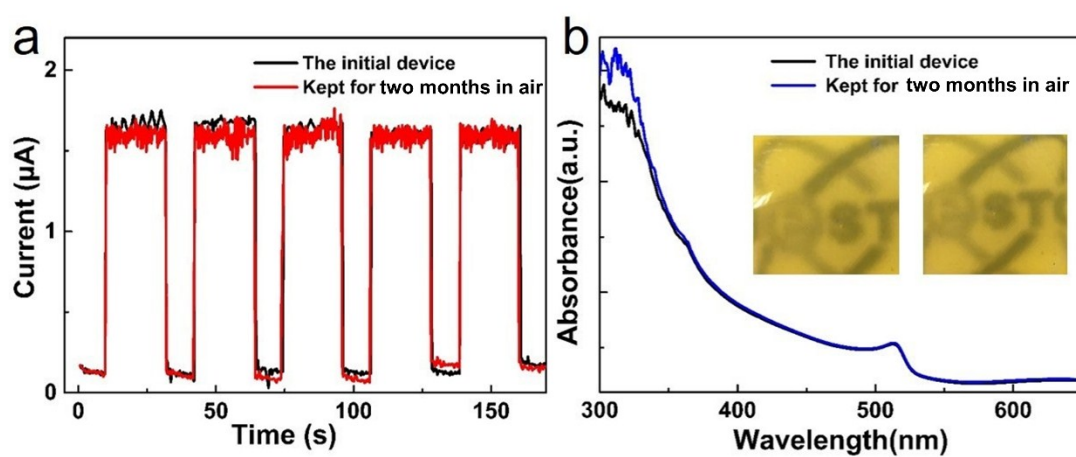

**Figure S11.** Comparison of environmental stability of the device kept in air for two months with 35~45% relative humidity. (a) The reproducible I-t curves of the devices measured for periodic light on/off. (b) Absorption spectra of the devices in fresh and kept in air for two months. The inset digital photos show that the  $\text{CsPbBr}_3$  perovskite is stable even after two months.

Table S1 Performance comparison of our device with other reported CsPbBr<sub>3</sub> photodetectors

| Device structure                | Material structure | substrate               | Detectivity<br>(Jones) | Rise/ decay<br>time (ms) | Refs.     |
|---------------------------------|--------------------|-------------------------|------------------------|--------------------------|-----------|
| Au/CsPbBr <sub>3</sub> /Au      | Single crystal     | None/rigid              | 10 <sup>11</sup>       | 90.7/57                  | [1]       |
| Pt/CsPbBr <sub>3</sub> /Au      | Single crystal     | None/rigid              | 10 <sup>11</sup>       | 230/60                   | [2]       |
| Au/ CsPbBr <sub>3</sub> /RGO/Au | Thin film          | SiO <sub>2</sub> /rigid | -                      | 417/414                  | [3]       |
| ITO/ CsPbBr <sub>3</sub> /ITO   | Thin film          | Si/rigid                | -                      | 600/640                  | [4]       |
| Au/CsPbBr <sub>3</sub> /Au      | Thin film          | PET/flexible            | 10 <sup>10</sup>       | 260/280                  | This work |

## Reference

- [1] J. Ding, S. Du, Z. Zuo, Y. Zhao, H. Cui, X. Zhan, *J. Phys. Chem. C* 2017, 121, 4917-4923.
- [2] M. I. Saidaminov, M. A. Haque, J. Almutlaq, S. Sarmah, X. H. Miao, R. Begum, A. A. Zhumekenov, I. Dursun, N. Cho, B. Murali, O. F. Mohammed, T. Wu, O. M. Bakr, *Adv. Opt. Mater.* 2017, 5, 1600704.
- [3] X. Tang, Z. Zu, Z. Zang, Z. Hu, W. Hu, Z. Yao, W. Chen, S. Li, S. Han and M. Zhou, *Sensors Actuators, B: Chem.*, 2017, 245, 435–440
- [4] D. Liu, Z. Hu, W. Hu, P. Wangyang, K. Yu, M. Wen, Z. Zu, J. Liu, M. Wang, W. Chen, M. Zhou, X. Tang and Z. Zang, *Mater. Lett.*, 2017, 186, 243–246.
